# Supplementary material
Source: MDPI journal article supplement (https://www.mdpi.com/2073-4441/11/10/2024)
Supplement: s1 [file s1]

Table S1. Maps and photos of six municipality-led stormwater management pilot projects in Beijing and Copenhagen.

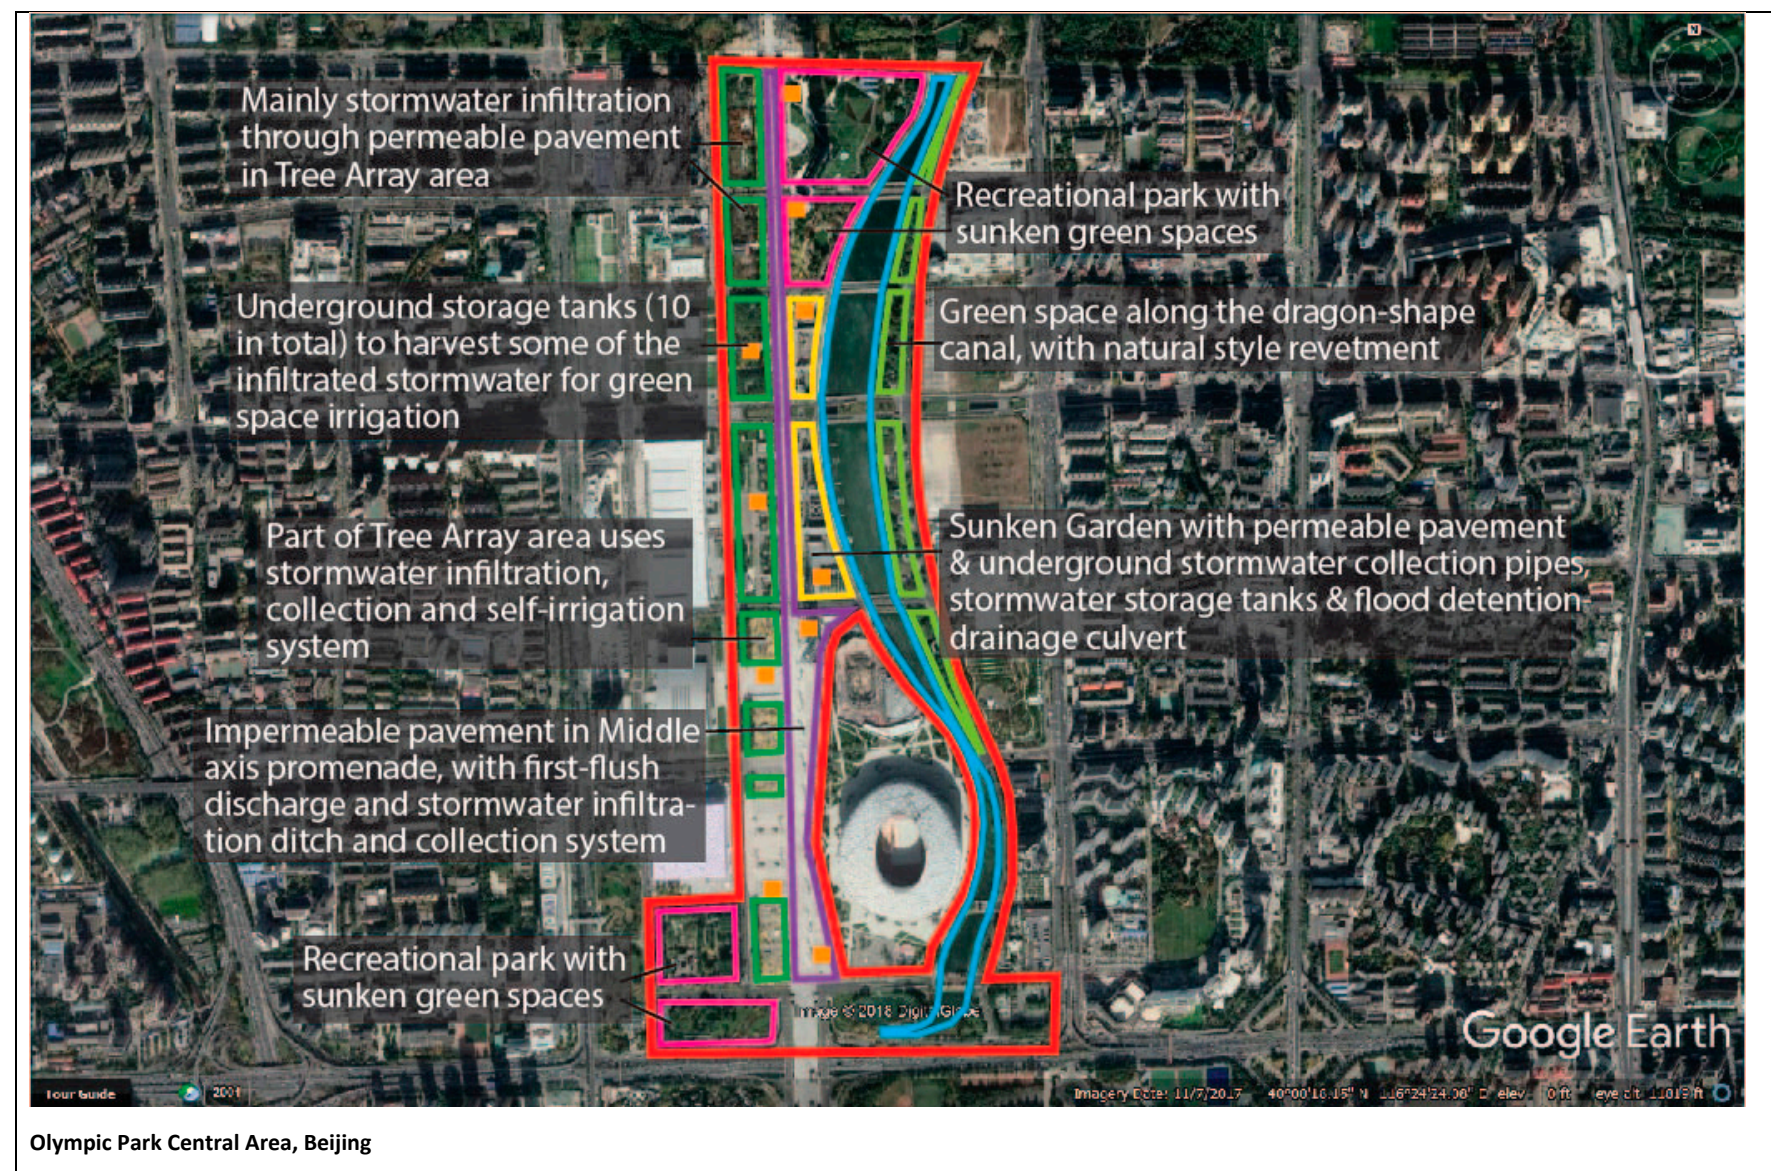



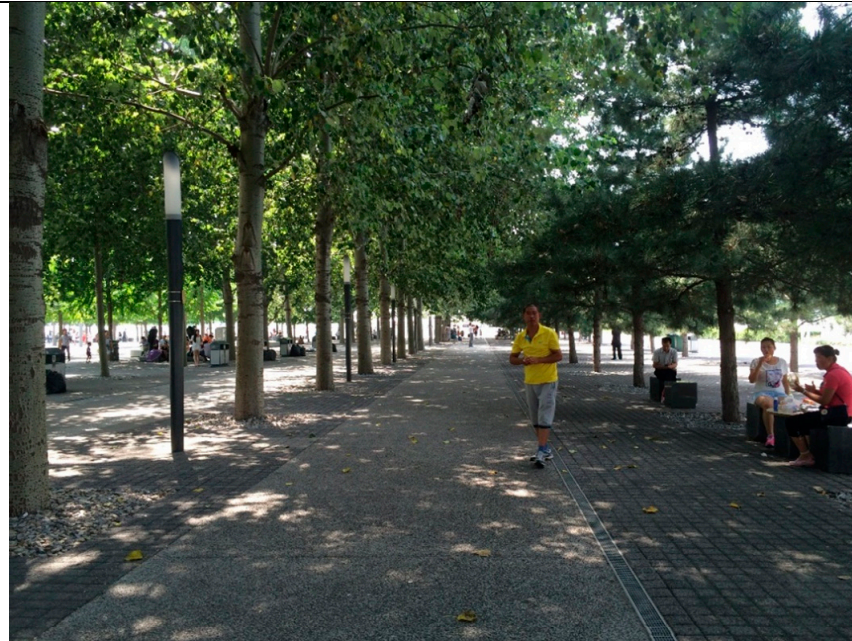

**Olympic Park Central Area, Beijing**

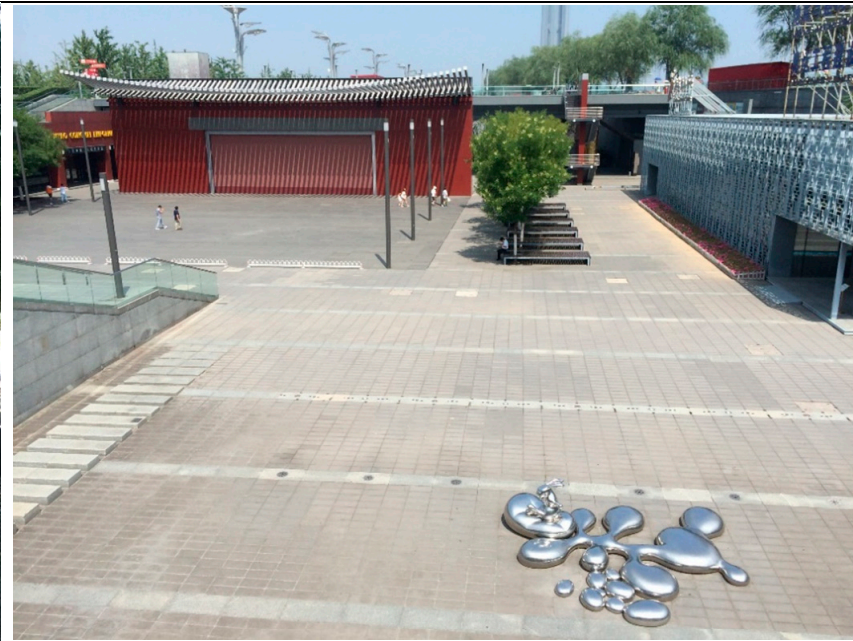



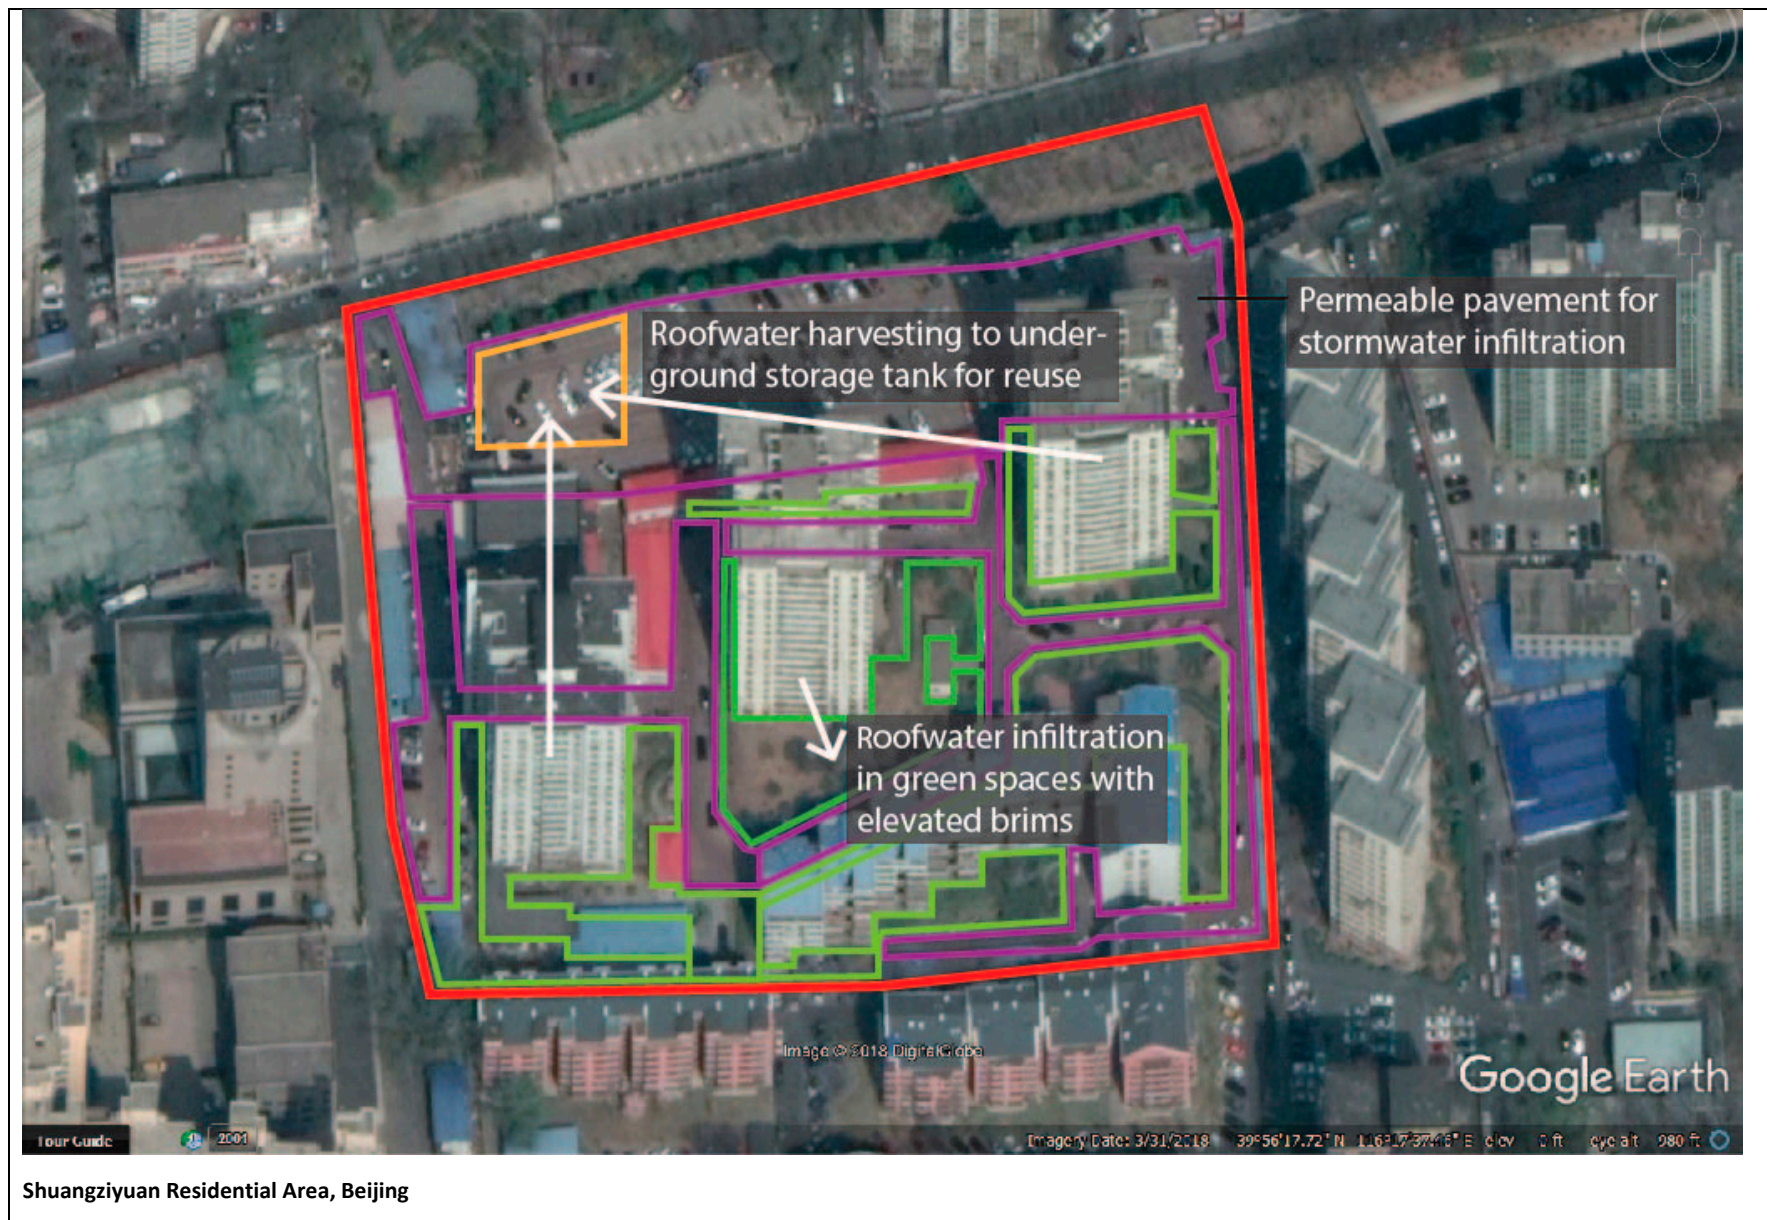



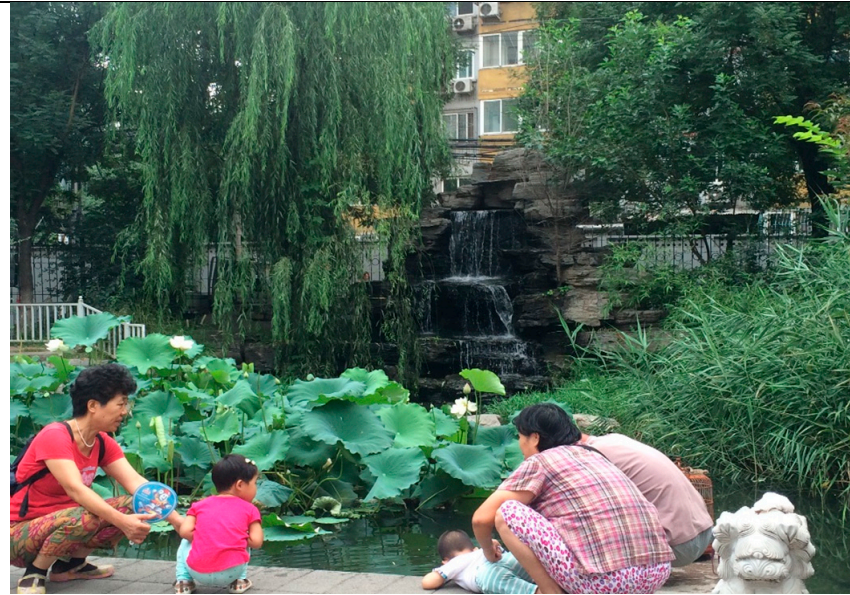

Shuangziyuan Residential Area, Beijing

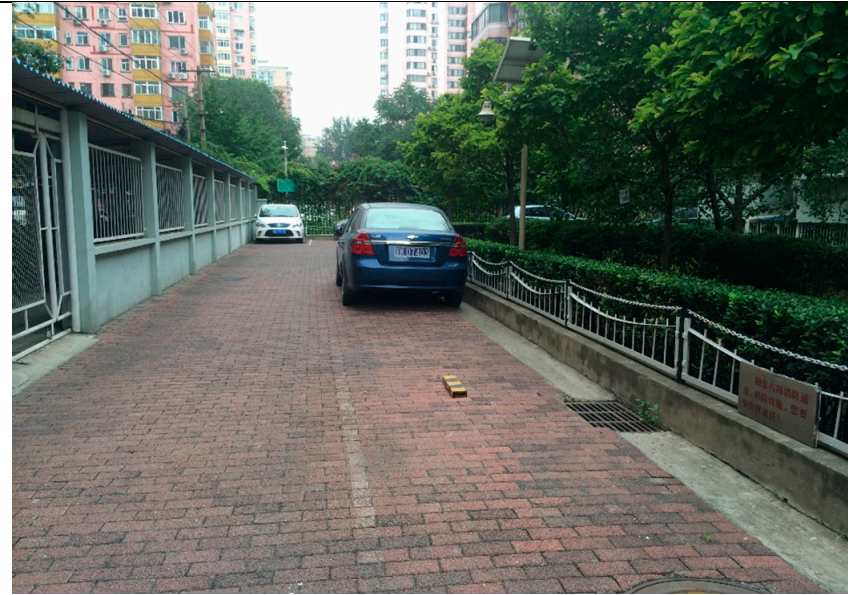



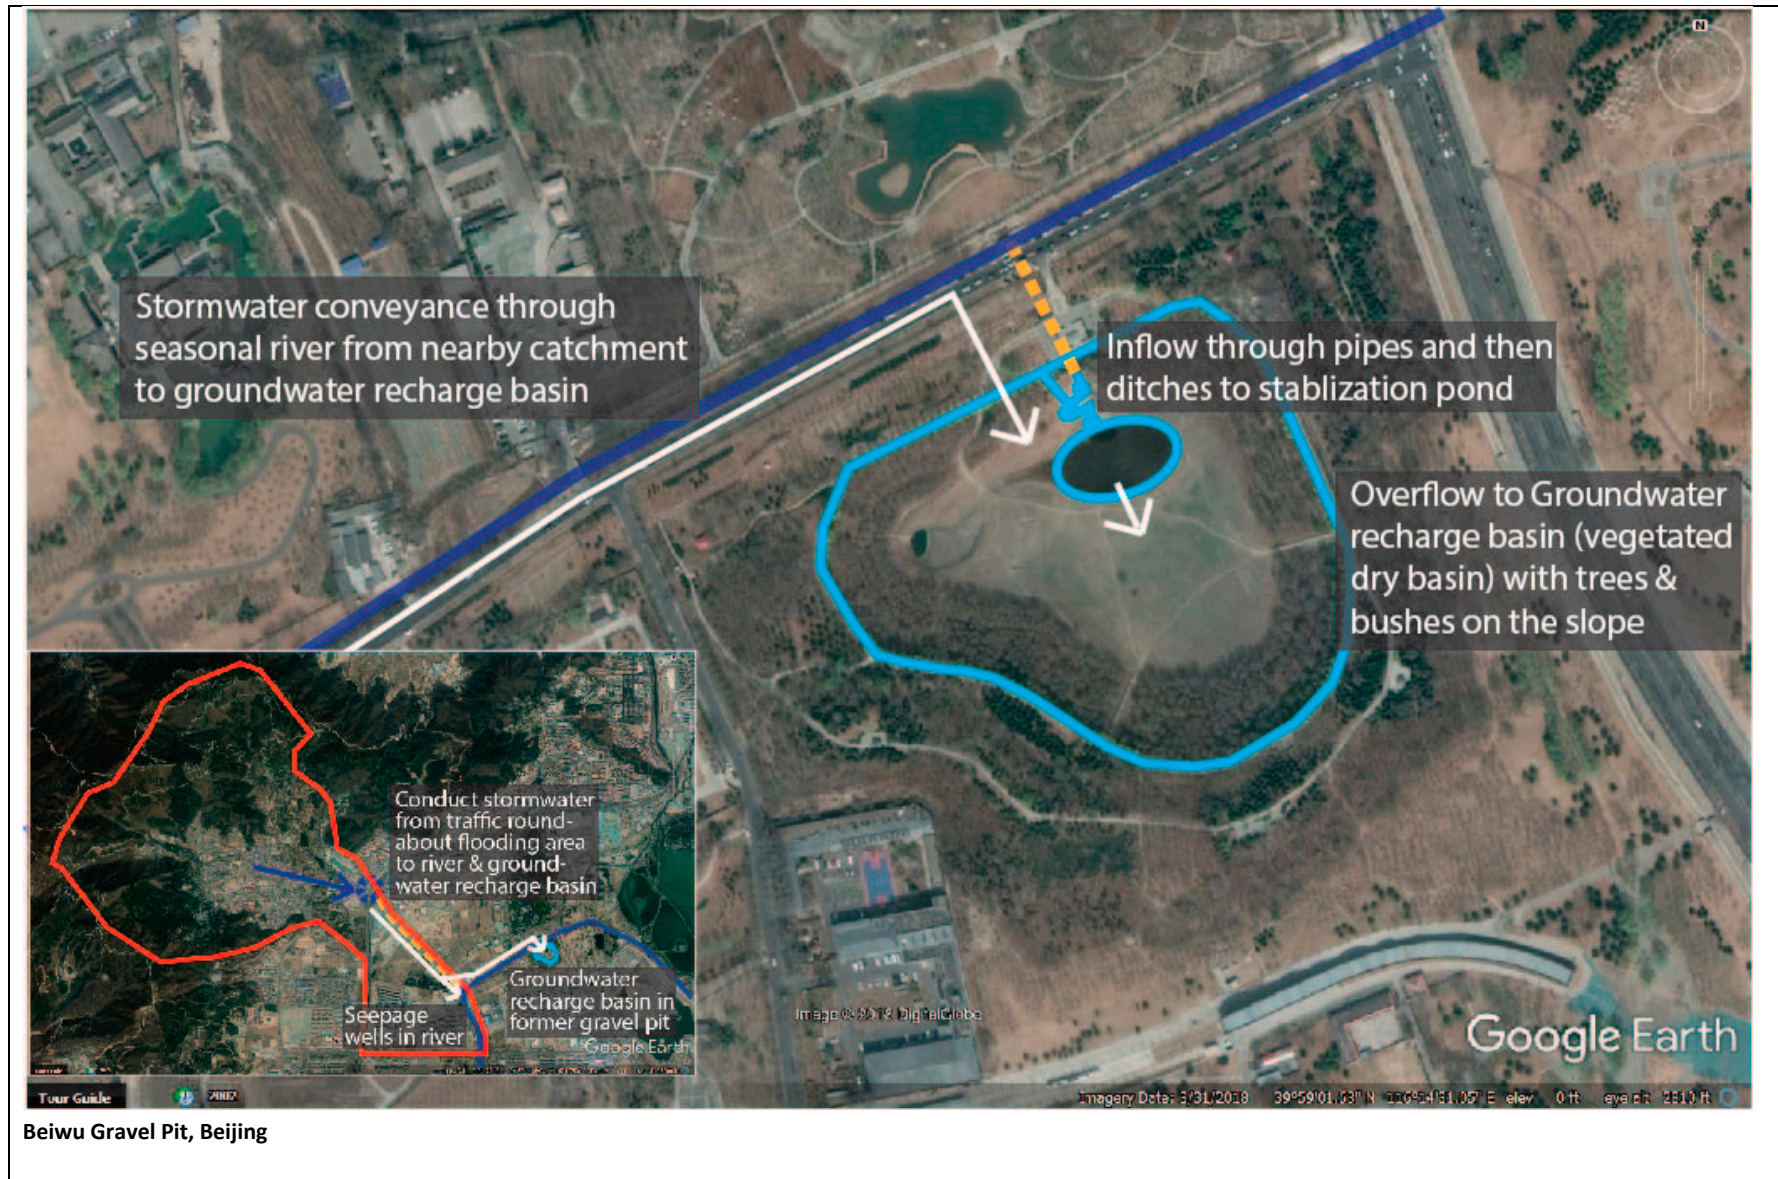



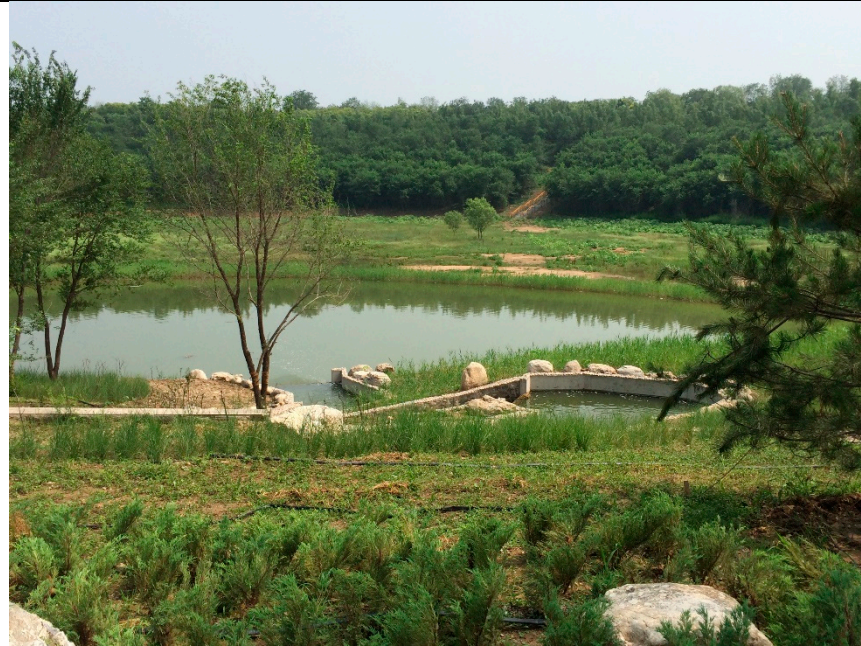

**Beiwu Gravel Pit, Beijing**

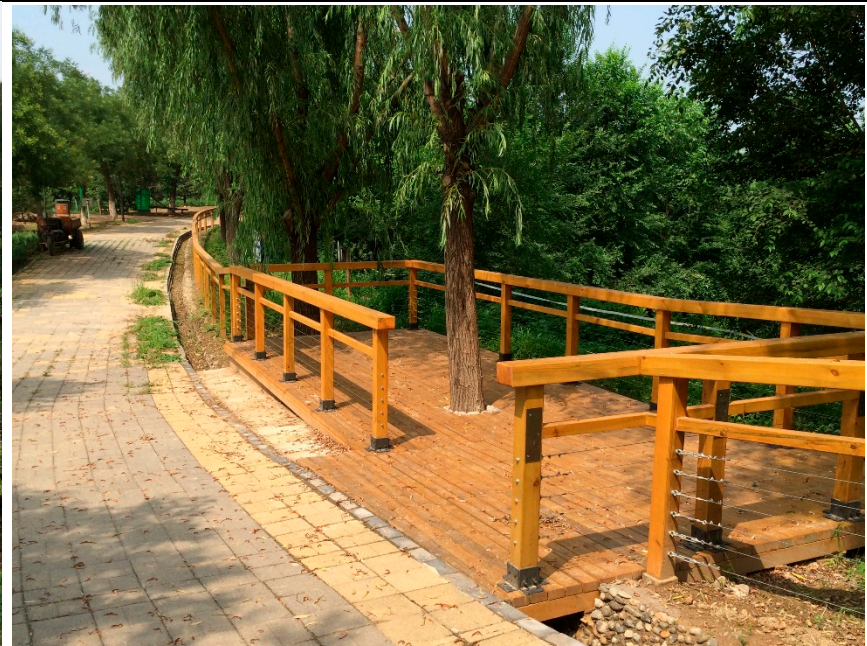



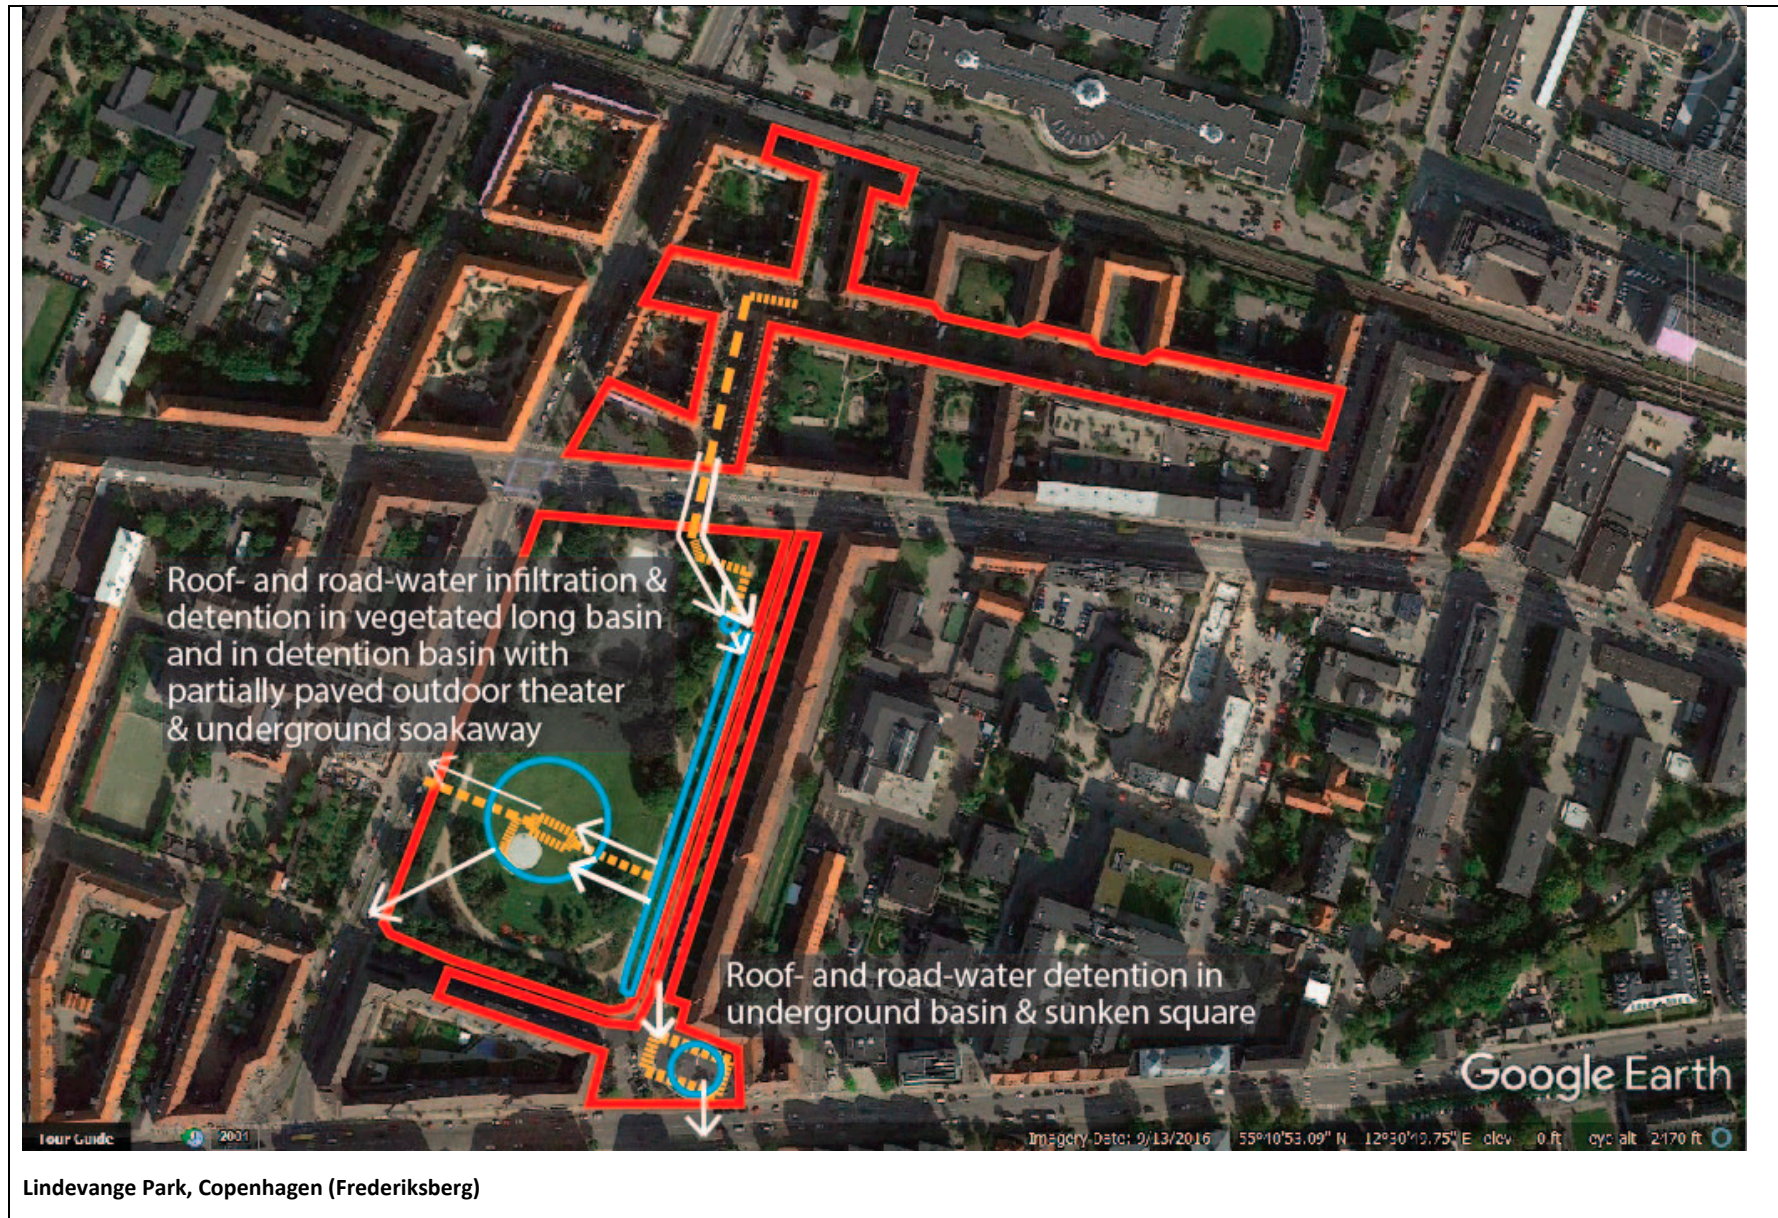



*Supplementary material for Manuscript: Blue-Green Infrastructure for sustainable urban stormwater management – lessons from six municipality-led pilot projects in Beijing and Copenhagen*

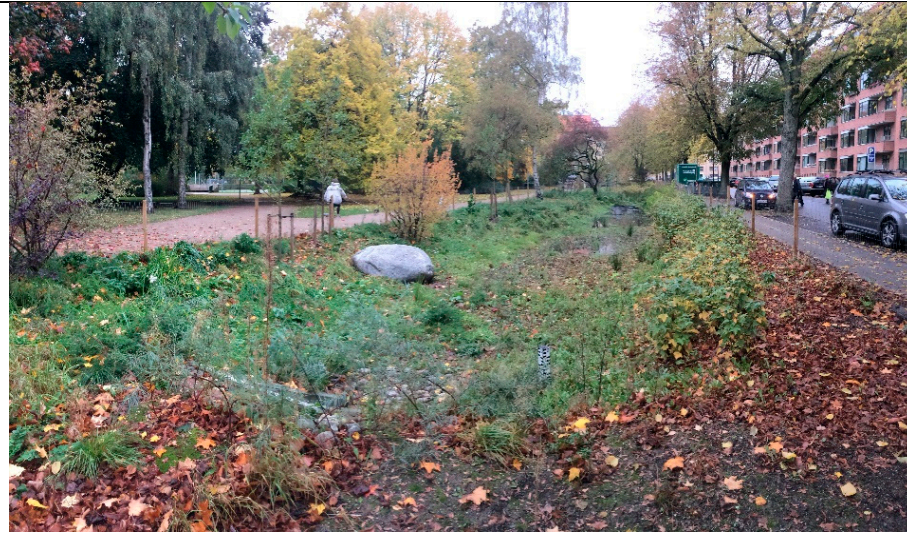

**Lindevange Park, Copenhagen (Frederiksberg)**

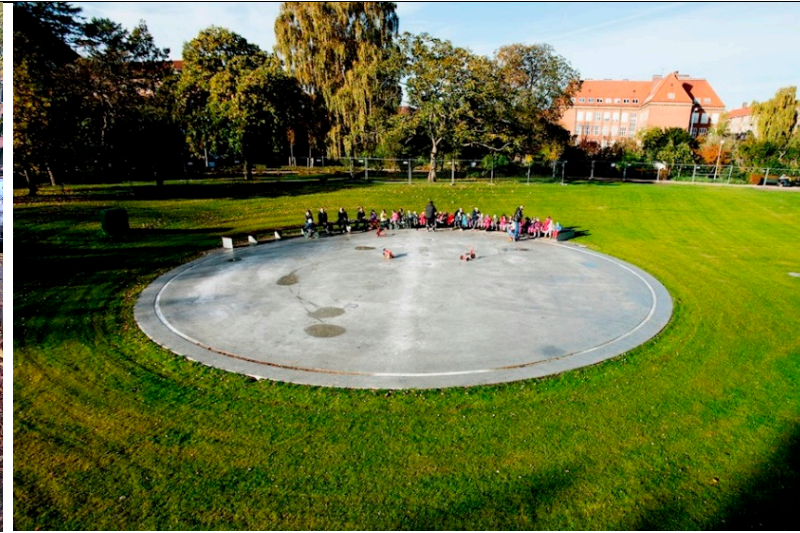

((Photo source: <https://www.loa-fonden.dk/projekter/2015/byens-vand-i-lindevangsparken-i-frederiksberg/>)



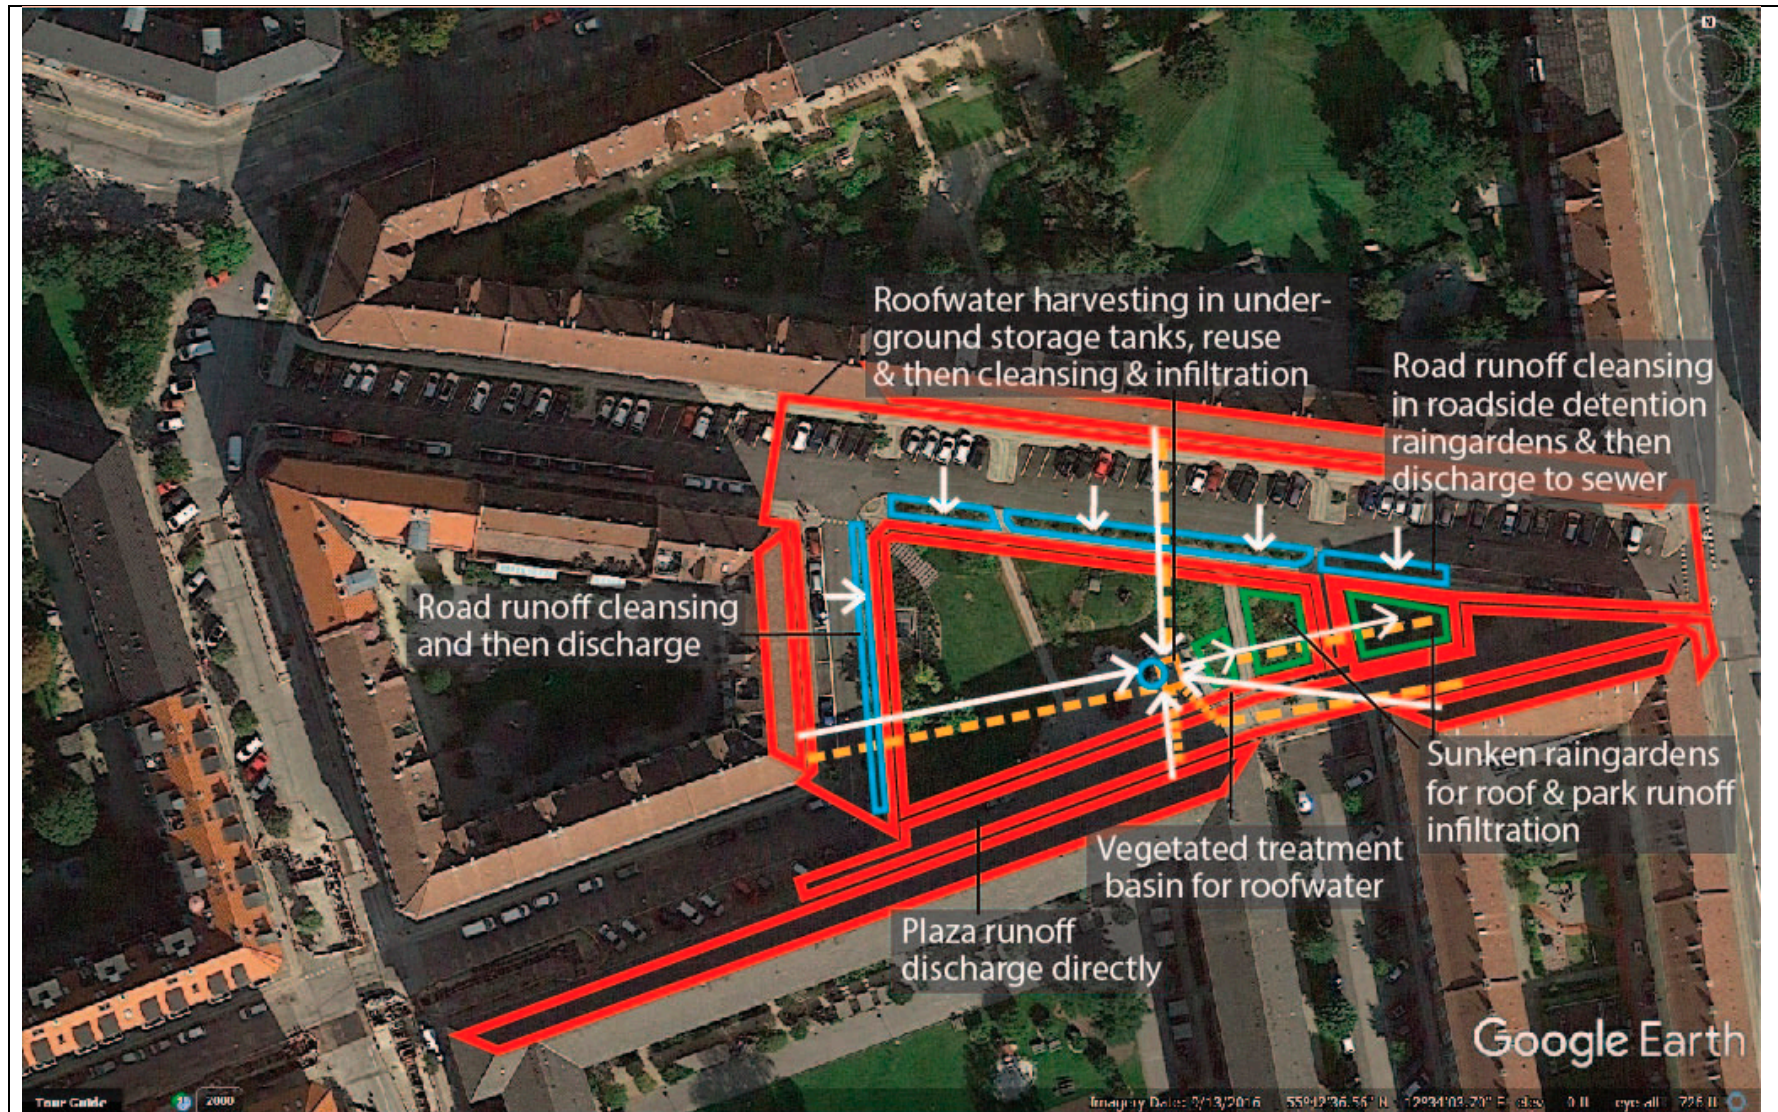

Tåsinge Square, Copenhagen



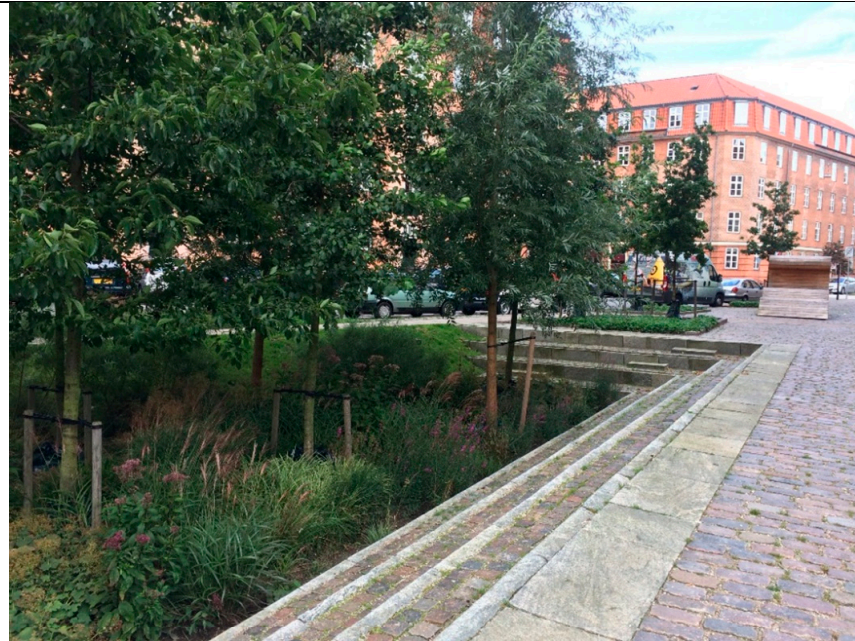

Tåsinge Square, Copenhagen

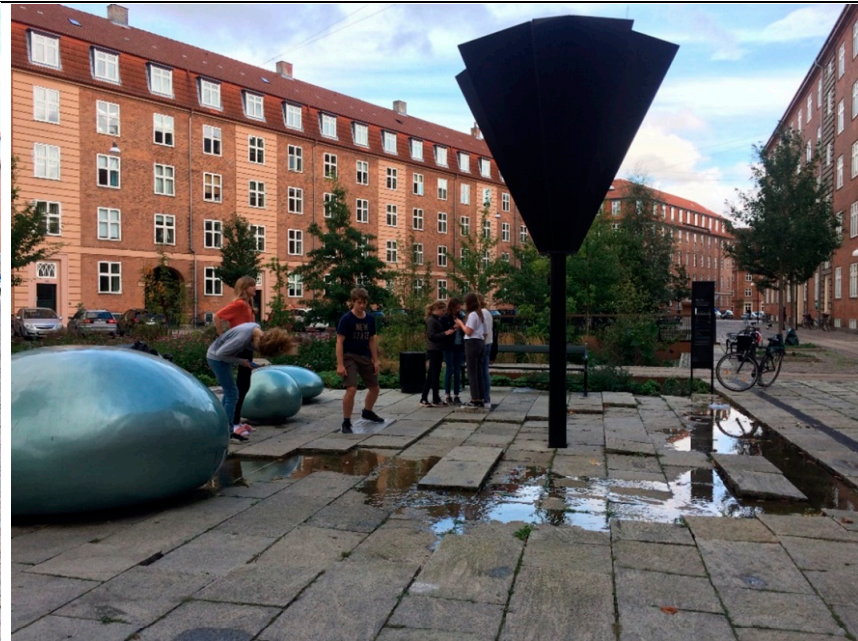



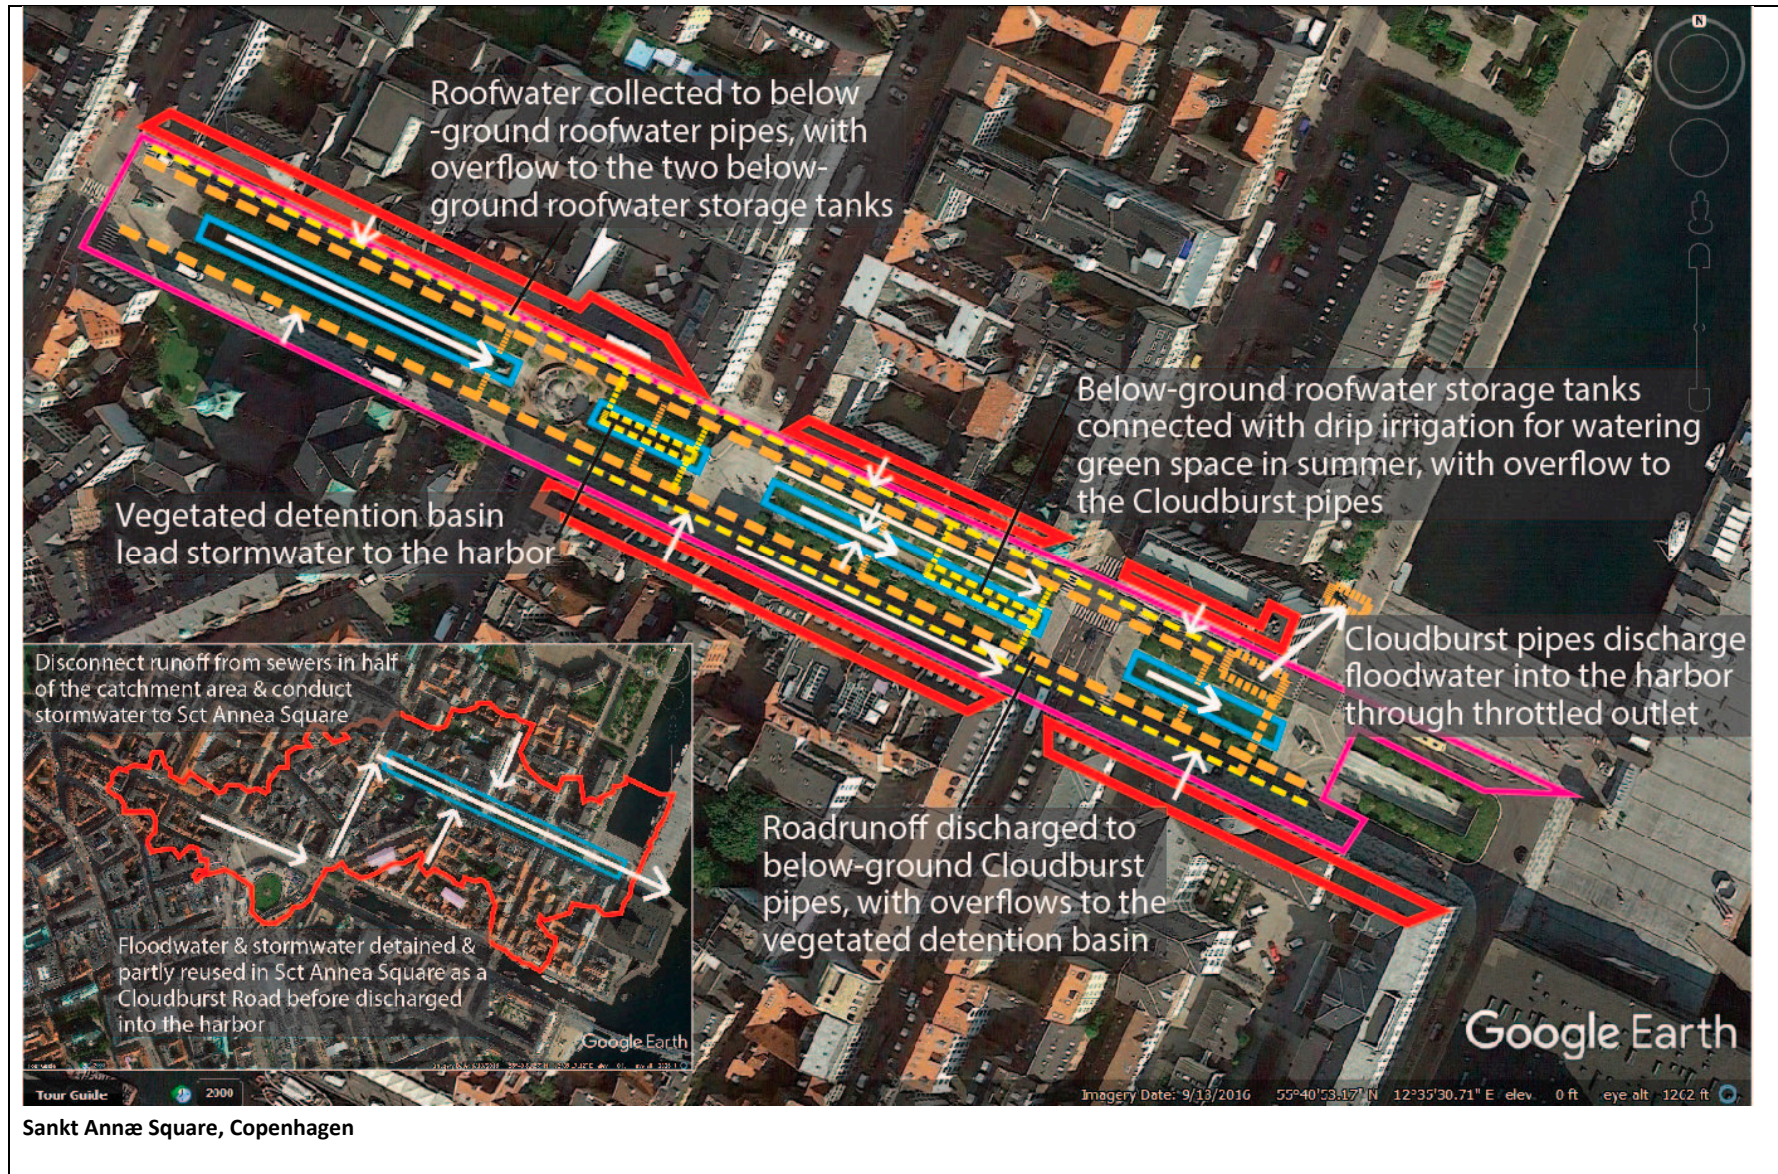



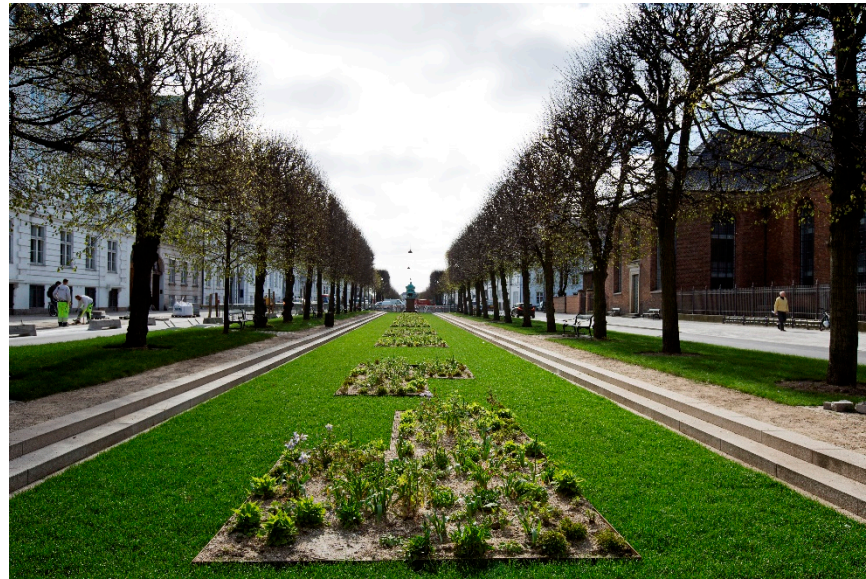

*(Photo source: HOFOR)*

**Sankt Annæ Square, Copenhagen**

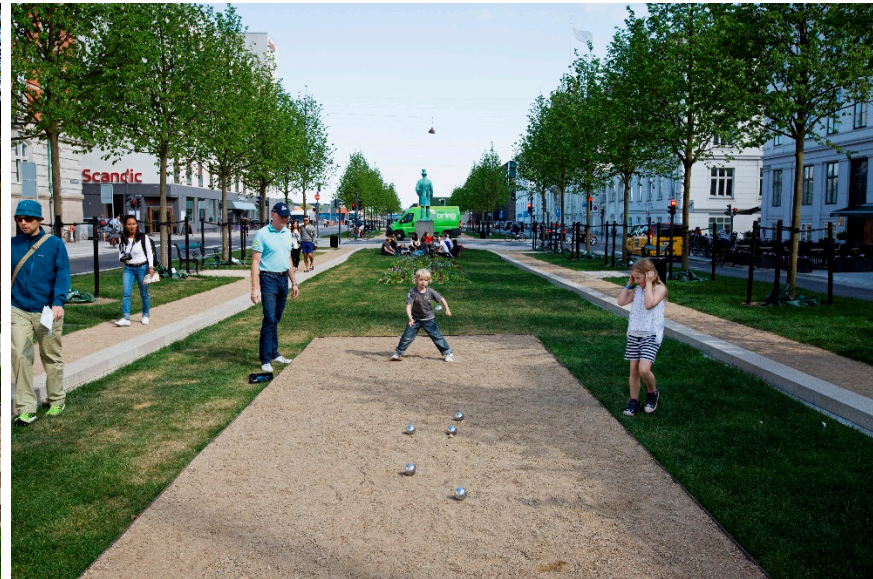

*(Photo source: HOFOR)*
